# Supplementary material for: Rapid and sensitive detection of alkaline phosphatase and glucose oxidase activity through fluorescence and colorimetric dual-mode analysis based on CuO NPs@ZIF-8 mediated enzyme-cascade reactions
Source: Royal Society of Chemistry journal article supplement (doi:10.1039/d3na00427a), 2023-01-01
Supplement: d3na00427a1.pdf [file d3na00427a1.pdf]

1 **Supplementary Materials**  
2  
3

4 **Rapid and sensitive detection of alkaline phosphatase and**  
5 **glucose oxidase activity through fluorescence and**  
6 **colorimetric dual-mode analysis based on CuO NPs@ZIF-8**  
7 **mediated enzyme-cascade reactions**

8  
9 Guo-Ying Chen <sup>a</sup>, Mao-Ling Luo <sup>a</sup>, Li Chen <sup>b</sup>, Tong-Qing Chai <sup>a</sup>, Jia-Li Wang <sup>a</sup>,  
10 Ling-Xiao Chen <sup>a</sup>, Feng-Qing Yang <sup>a,\*</sup>

11  
12 <sup>a</sup>, School of Chemistry and Chemical Engineering, Chongqing University, Chongqing  
13 401331, China

14 <sup>b</sup>, College of Optoelectronic Engineering, Key Laboratory of Optoelectronic  
15 Technology and Systems, Ministry of Education, Key Disciplines Lab of Novel Micro-  
16 Nano Devices and System Technology, Chongqing University, Chongqing 400044,  
17 China

18 \*Corresponding Authors: Prof. Dr. Feng-Qing Yang, School of Chemistry and  
19 Chemical Engineering, Chongqing University, Chongqing 401331, China. Tel:  
20 +8613617650637. E-mail: fengqingyang@cqu.edu.cn.

21

22 **Mass spectrometry analysis**

23 All mass spectrometry (MS) experiments were performed on a Triple Quad 5500+ mass  
24 spectrometer (AB SCIEX, Singapore) equipped with standard ESI source. The reaction  
25 mixtures of CuO NPs@ZIF-8 + AAP + OPD, CuO NPs@ZIF-8 + ALP + AAP + OPD,  
26 CuO NPs@ZIF-8 + AAP + GOX +OPD, and CuO NPs@ZIF-8 + ALP + AAP + GOX  
27 + OPD were analyzed by MS, respectively. CuO NPs@ZIF-8, 100  $\mu$ L; ALP (20.00  
28 U/mL), 1  $\mu$ L; AAP (10.00 mM), 600  $\mu$ L; GOX (17.53 U/mL), 100  $\mu$ L. The above  
29 reaction solutions were added into a 1.5-mL centrifuge tube, respectively. After  
30 incubation at 60 °C for 10 min, 600  $\mu$ L of OPD (20.00 mM) was added into the above  
31 solution and incubated for another 10 min. Then, the solution after reaction was  
32 centrifugation for 1 min at 10000 rpm. Pass the supernatant through a 0.22  $\mu$ m  
33 membrane and take 0.5 mL of supernatant for MS analysis. The MS analysis conditions  
34 are as follows. MS: scan range: 50–1000  $m/z$ ; Ion Source Gas 1, Atomization assisted  
35 heating gas 2, Curtain Gas, and Collision Gas are N<sub>2</sub>, and the corresponding parameters  
36 are 50, 50, 30, and 9 psi. The heating temperature of Gas 2 is 500 °C, the de-clustering  
37 voltage is 110 V, and the Ion spray voltage is 5500 V, respectively. All analyses were  
38 conducted in a positive ion mode.

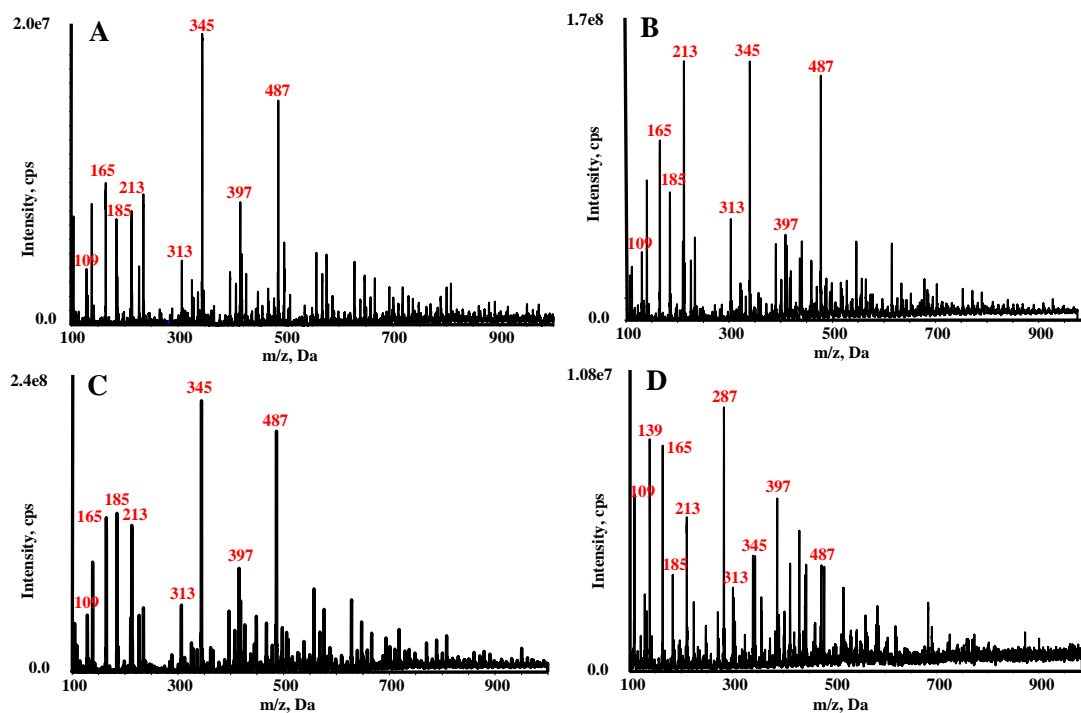

39  
40  
41  
42  
43  
44

Fig. S1 Mass spectra of the reaction mixtures of CuO NPs@ZIF-8 + AAP + OPD (A), CuO NPs@ZIF-8 + ALP + AAP + OPD (B), CuO NPs@ZIF-8 + AAP + GOX + OPD (C), and CuO NPs@ZIF-8 + ALP + AAP + GOX + OPD (D)

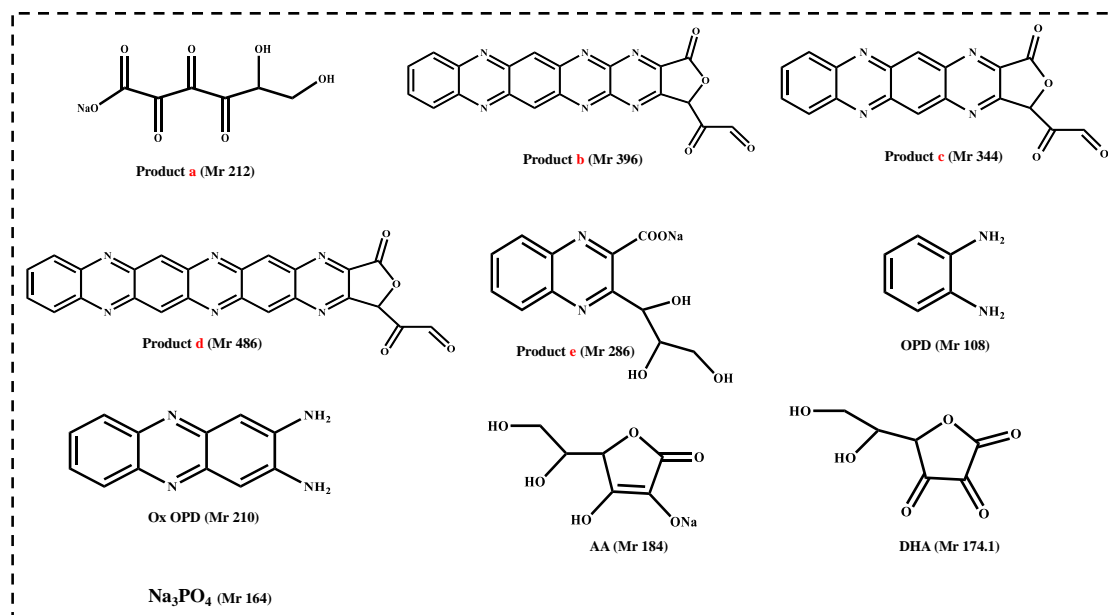

45  
46  
47

Fig. S2 The chemical structures of identified compounds

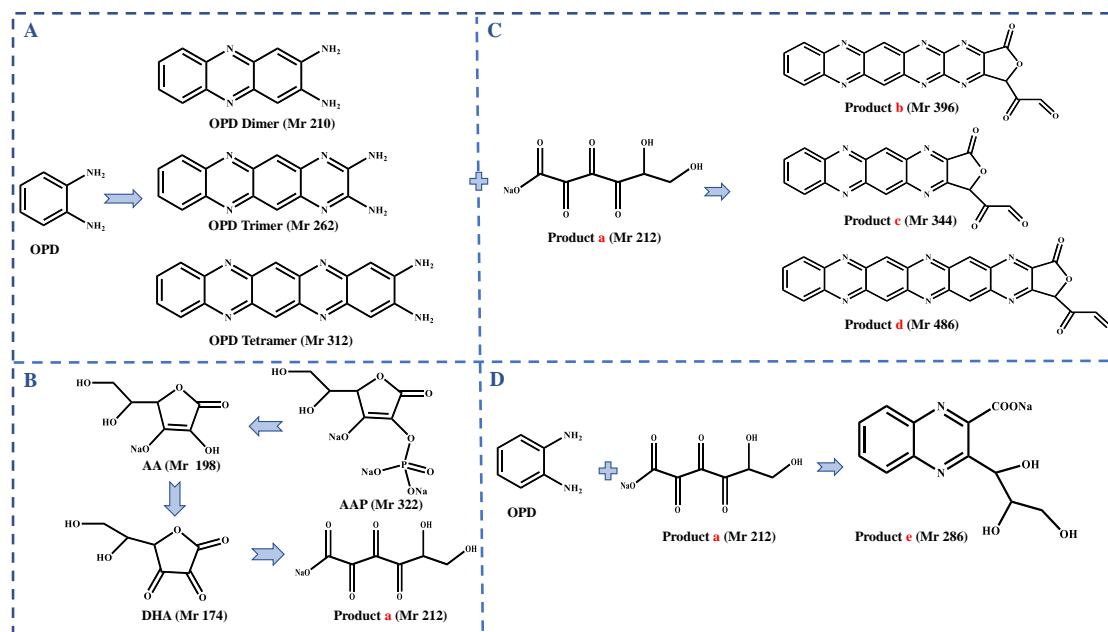

48

49 Fig. S3 The main possible catalytic reaction processes between CuO NPs@ZIF-8, AAP, and OPD.

50

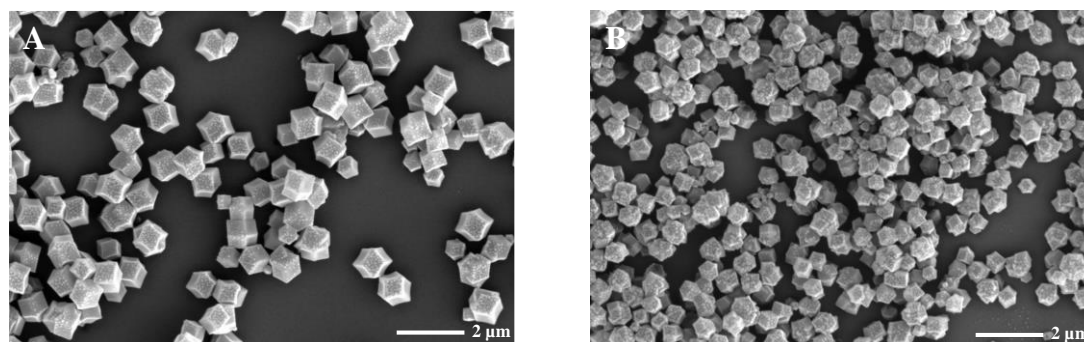

51

52

Fig. S4 The SEM images of CuO NPs@ZIF-8 with CuO NPs 5 mg (A) and 8 mg (B)

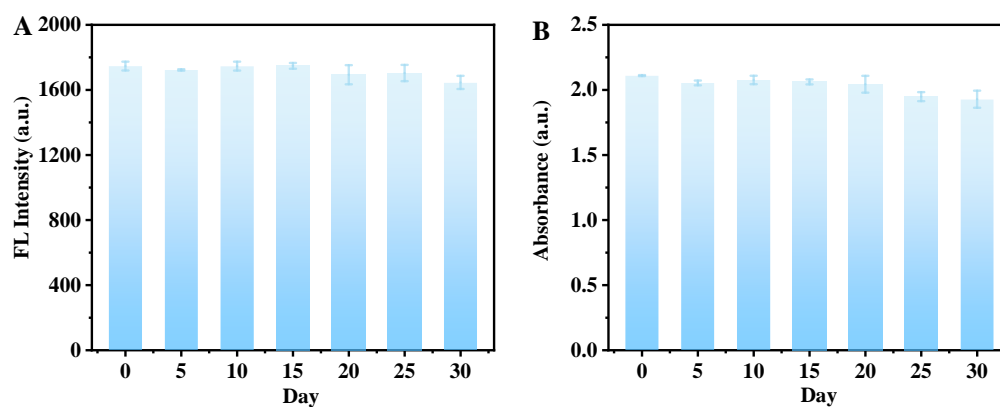

53

54

Fig. S5 The storage stability by fluorescence (A) and UV-Vis (B) analysis
